# Supplementary material
Source: bioRxiv or medRxiv preprint supplement (http://medrxiv.stage.highwire.org/highwire/filestream/84634/field_highwire_adjunct_files/0/2020.03.30.20047860-1.pdf)
Supplement: Supplementary file [file 2020.03.30.20047860-1.pdf]

*Cost-effectiveness analysis of social distancing strategies to prevent SARS-CoV2 spread*

*Amir Shlomai MD,PhD<sub>1</sub>, Ari Leshno MD<sub>2</sub>, Ella H. Sklan PhD<sub>3</sub>\*+, Moshe Leshno MD,PhD<sub>4</sub>\**

*\* equal contribution +Corresponding author*

*Ella H. Sklan [sklan@tauex.tau.ac.il](mailto:sklan@tauex.tau.ac.il)*

**This file includes:**

1. Tables S1-S3
2. Figures S1-S5

|                   | <b>Cost (\$)</b> | <b>Number of deaths</b> | <b>ICER (\$)</b> |
|-------------------|------------------|-------------------------|------------------|
| <b>Strategy 1</b> | 1.0694e+10       | 322                     | -                |
| <b>Strategy 2</b> | 8.8015e+07       | 464                     | 7.5111e+07       |

**Table S1: Summary of the costs and number of deaths in each strategy.**

|                   | <b>Quarantine (Global)</b>  | <b>Social distancing</b>                                          | <b>Isolation</b>         | <b>14-day isolation</b>           |
|-------------------|-----------------------------|-------------------------------------------------------------------|--------------------------|-----------------------------------|
| <b>Strategy 1</b> | All susceptible individuals | Individuals that are not under quarantine for exceptional reasons | All infected individuals | Individuals at high exposure risk |
| <b>Strategy 2</b> | None                        | All susceptible Individuals                                       | All infected Individuals | Individuals at high exposure risk |

**Table S2: Summary of the two proposed strategies.**

| <b>Strategy 1</b> | <b>Base</b> | <b>Low</b> | <b>High</b> |                                                                                |
|-------------------|-------------|------------|-------------|--------------------------------------------------------------------------------|
| r1_HR_c           | 0.007       | 0.005      | 0.009       | proportion of the population under focused isolation due to high-exposure risk |
| r1_S2             | 0.8         | 0.7        | 0.9         | proportion of the S population under global quarantine                         |
| r1_I              | 0.9         | 0.8        | 0.95        | proportion of the I population under isolation                                 |
| r1_E              | 0.3         | 0.2        | 0.4         | proportion of the E population under isolation                                 |
| <b>Strategy 2</b> | <b>Base</b> | <b>Low</b> | <b>High</b> |                                                                                |
| r2_HR_c           | 0.003       | 0.001      | 0.005       | proportion of the population under focused isolation due to high-exposure risk |
| r2_S2             | 0           | 0          | 0           | proportion of the S population under global quarantine                         |
| r2_S1             | 0.9         | 0.8        | 1           | proportion of S population to adopt social distancing measures                 |
| r2_I              | 0.9         | 0.8        | 0.95        | proportion of the I population under isolation                                 |
| r2_E              | 0.3         | 0.2        | 0.4         | proportion of the E population of under isolation                              |

**Table S3: Assumptions according to the two tested strategies.**

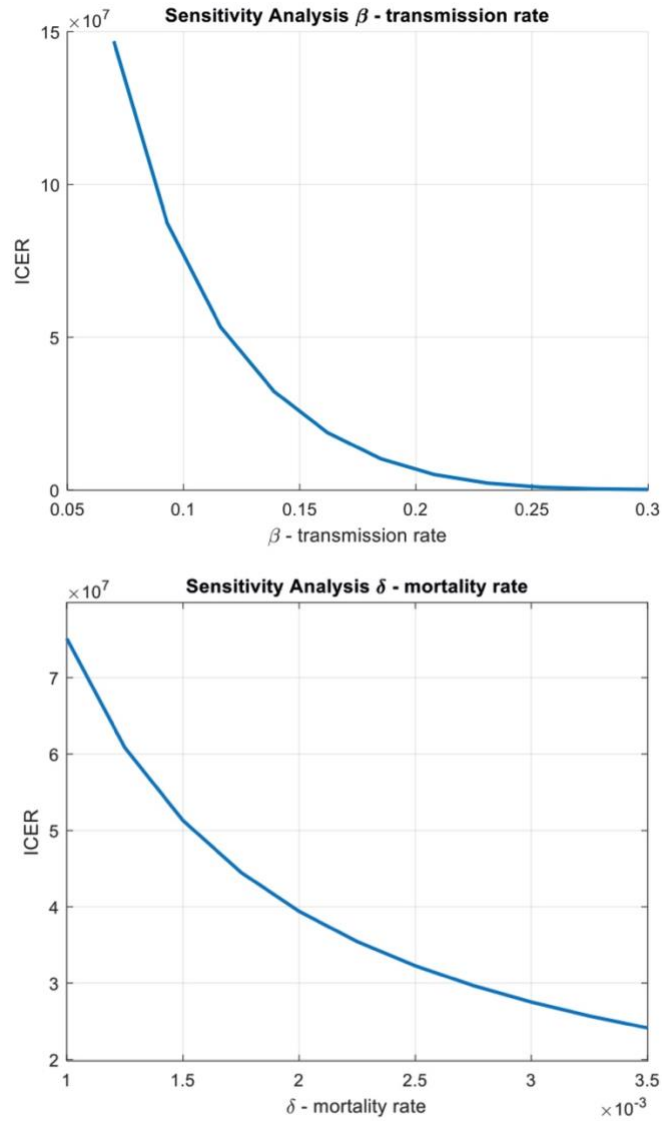

Fig S1

**Figure S1. Sensitivity analysis.** Sensitivity analysis comparing the relative effect of the transmission rate ( $\beta$ , upper panel) and mortality rate ( $\delta$ , lower panel) on the incremental cost effectiveness ratio (ICER).

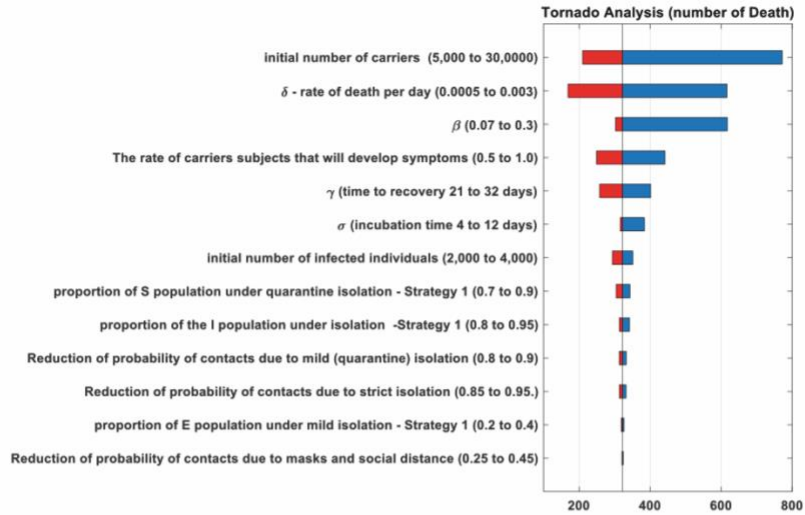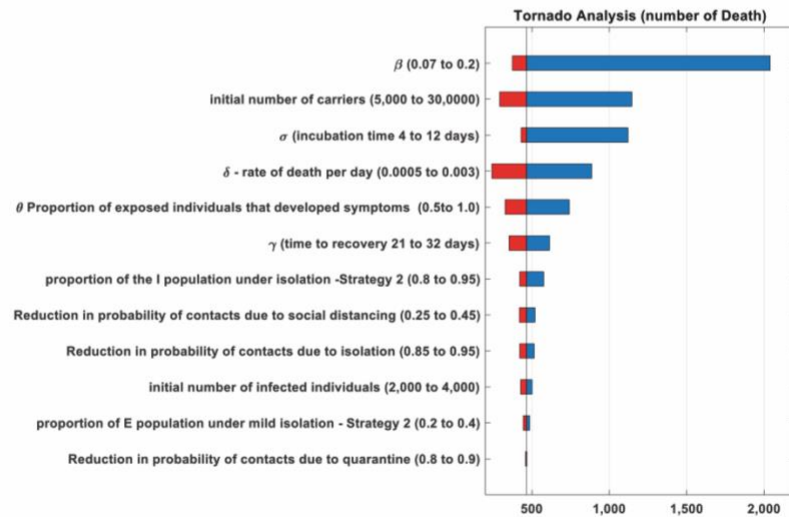

Fig S2

**Figure S2. One-way sensitivity analysis.** Tornado diagram of the number of deaths in strategy 1 (top) and strategy 2 (bottom).

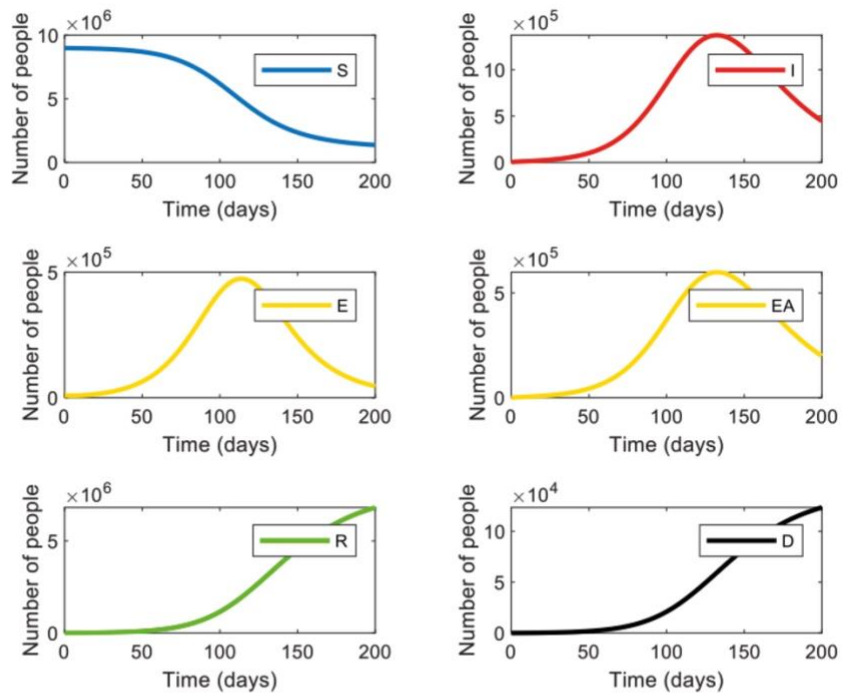

Fig S3

**Figure S3: Infection dynamics without interventions.** The graphs display the dynamics within the six compartments over time. Susceptible (S, blue); Infected (I, red); Carrier (Yellow, E); Carrier asymptomatic (Yellow, EA); Recovered (R, Green), Dead (D, Black).

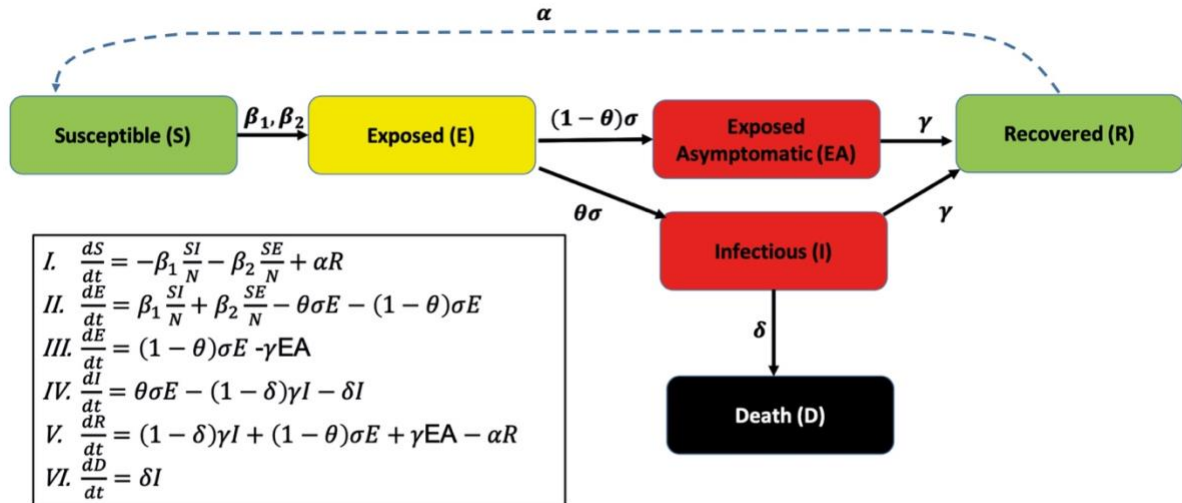

Fig S4

Figure S4. An illustration of the modified SIER model used in this study.

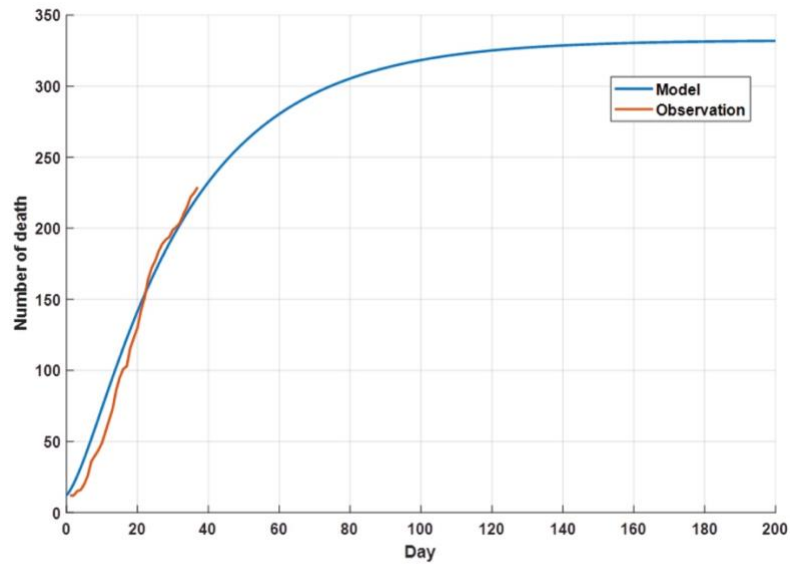

Fig S5

**Figure S5. Calibration analysis of the model parameters.** Comparison of the expected number of deaths according to our model to the actual observed number in Israel between March 27 to May 3, 2020.
